# Supplementary material for: Enterohemorrhagic Escherichia coli O157 subclade 8b strains in Chiba Prefecture, Japan, produced larger amounts of Shiga toxin 2 than strains in subclade 8a and other clades
Source: PLoS One. 2018 Jan 30;13(1):e0191834. doi: 10.1371/journal.pone.0191834 (PMC5790261; doi:10.1371/journal.pone.0191834)
Supplement: S7 Table — (XLSX) [file pone.0191834.s012.xlsx]

## Sheet: S7 Table
	S7 Table. Distribution of clades of all epidemiologically unlinked O157 strains.
	Clade	Lineage	Numbers of O157 strains
	1	I	8
	2	I	229
	3	I	323
	Des 4/5 a	I	40
	Anc 4/5 b	I/II	6
	6	I/II	42
	7	I/II	195
	8	I/II	121
	9	I/II	5
	Putative 10 c	II	2
	Putative 11 d	II	0
	12	II	118
	Putative 13 e	II	3
	Atypical f		24
	Total		1121
	a Descendant clade 4/5.
	b Ancestral clade 4/5.
	c Putative clade 10.
	d Putative clade 11.
	e Putative clade 13.
	f Unable to type. These strains produced no amplicons or amplicons of unclassifiable size for some loci by LSPA-6. The relationships between clades and lineages were incorrect in the O157 phylogenetic model.
